# Supplementary material for: PDIA4 confers resistance to ferroptosis via induction of ATF4/SLC7A11 in renal cell carcinoma
Source: PubMed Central journal article supplement (PMC10008556; doi:10.1038/s41419-023-05719-x), 2023-03-11

Figure 1E

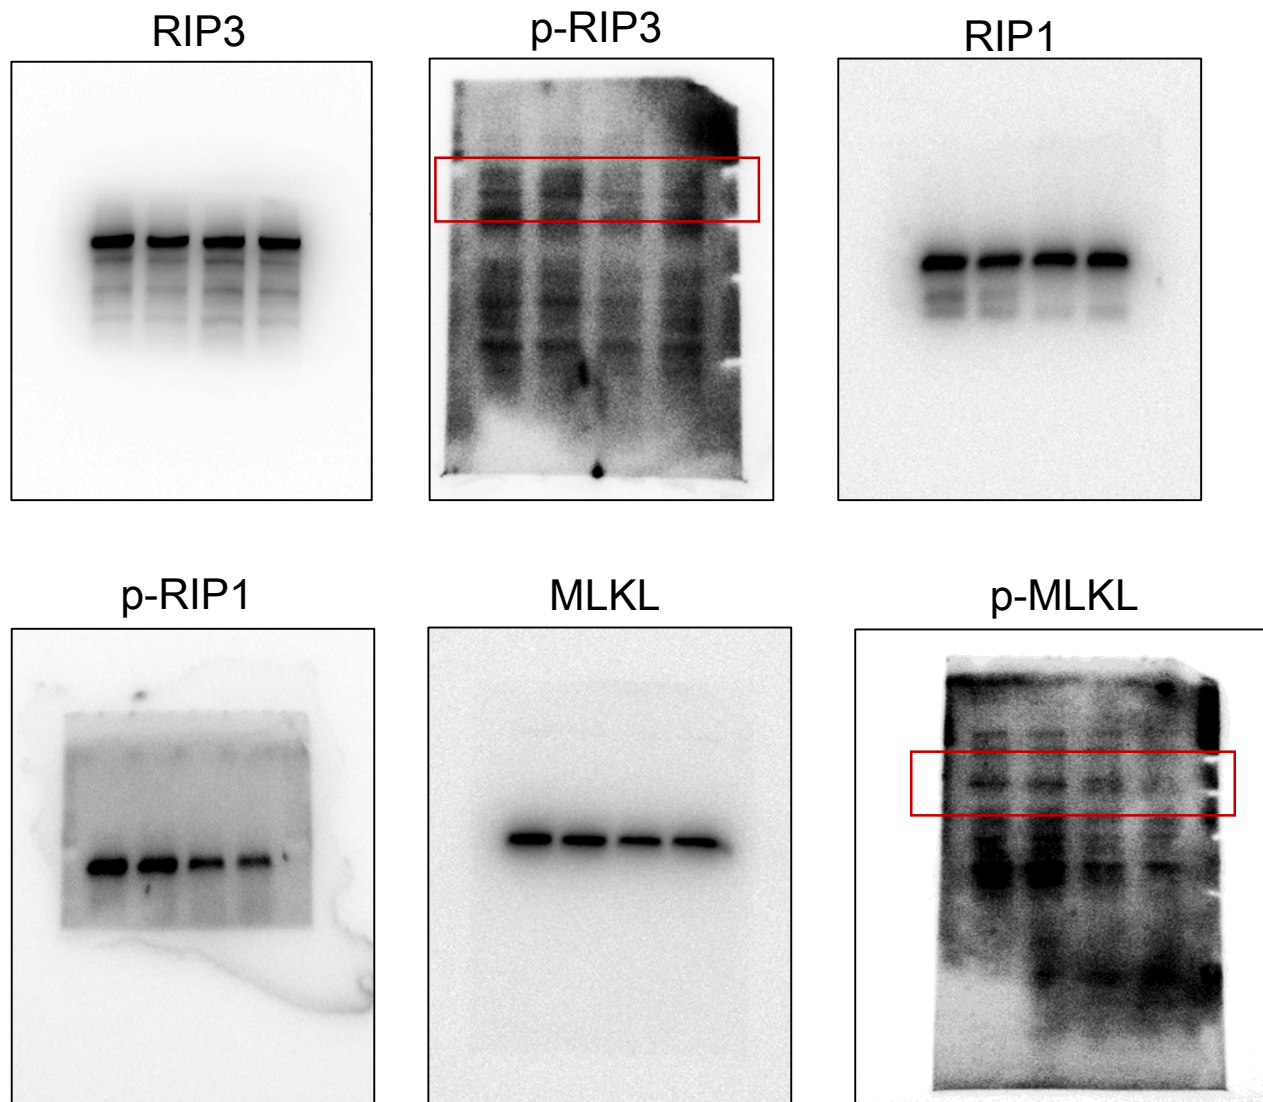

Figure 1E

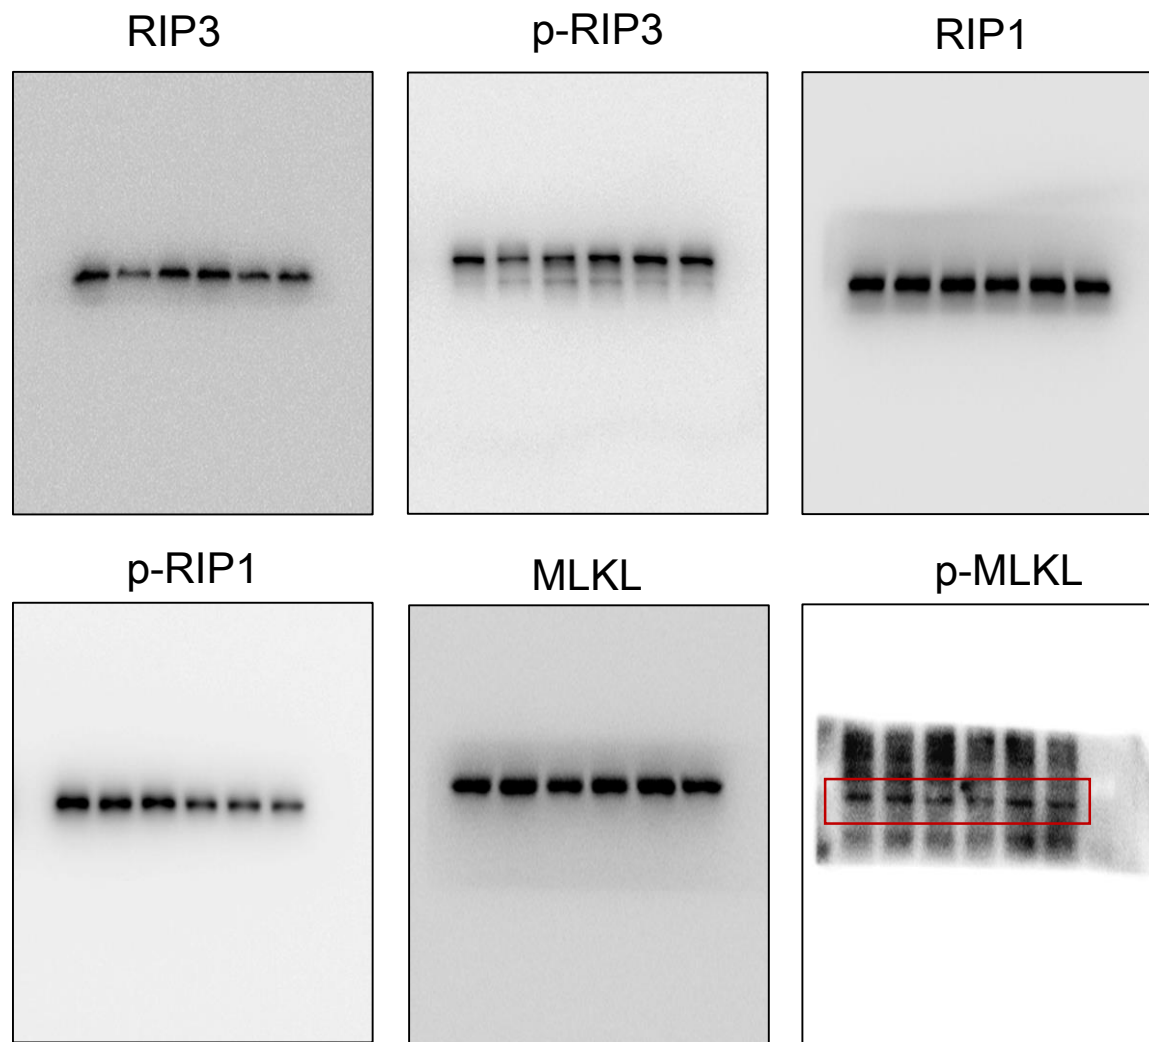

Figure 1F

Caspase3

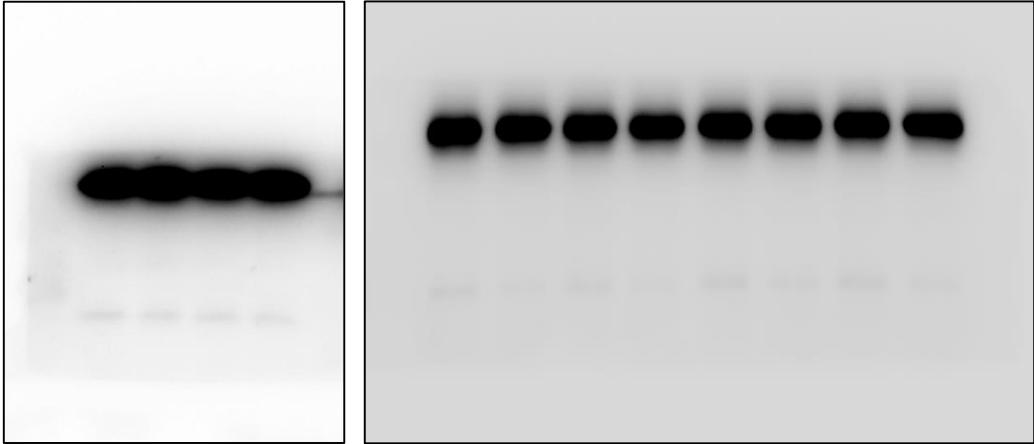

$\beta$ -actin

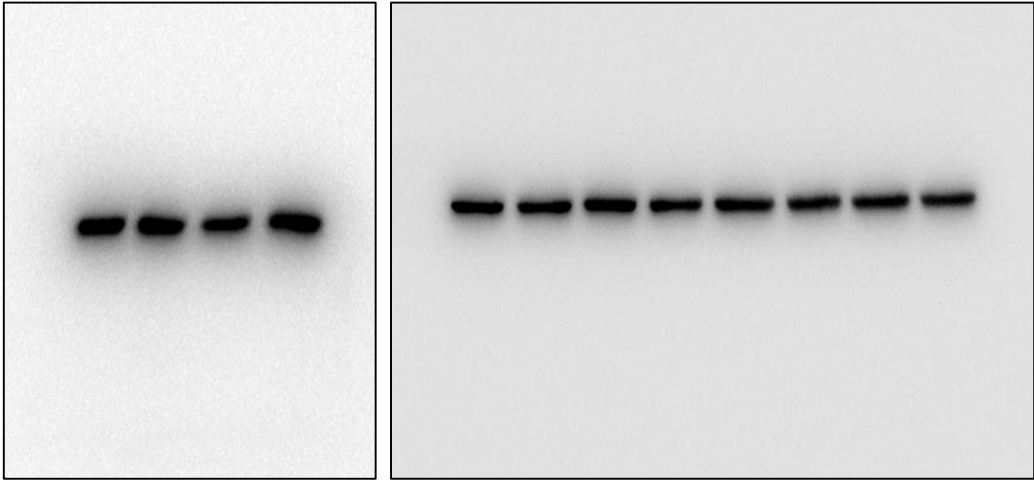

Figure 2C

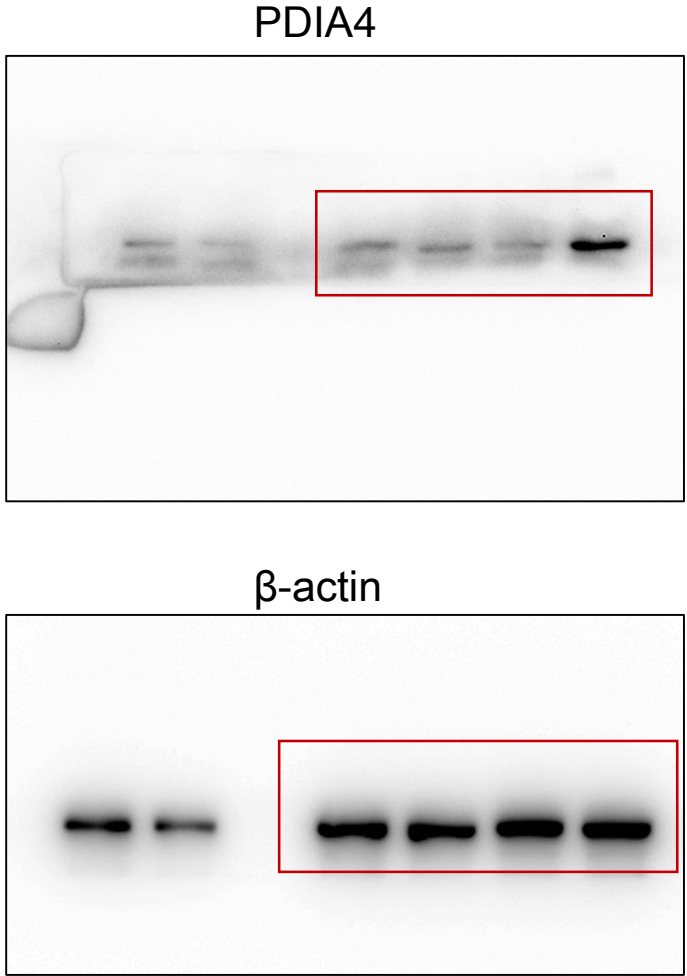

Figure 2D

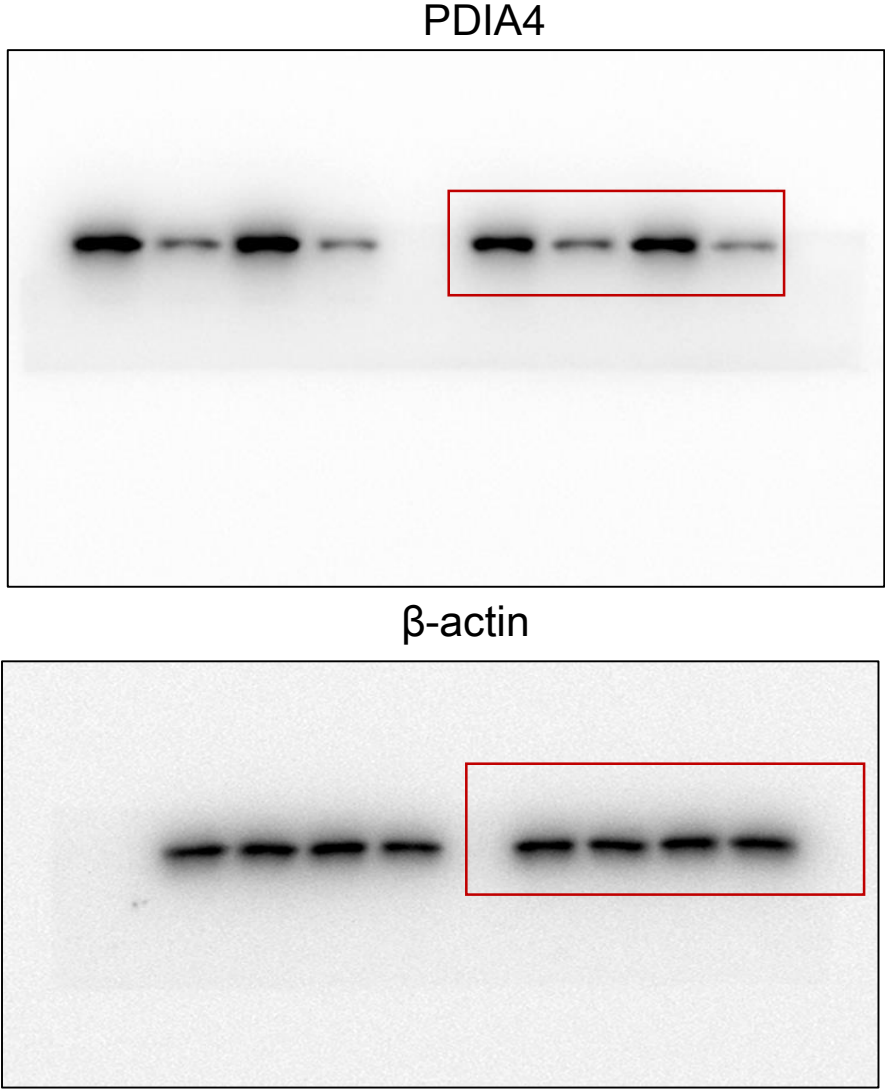

Figure 2E

PDIA4

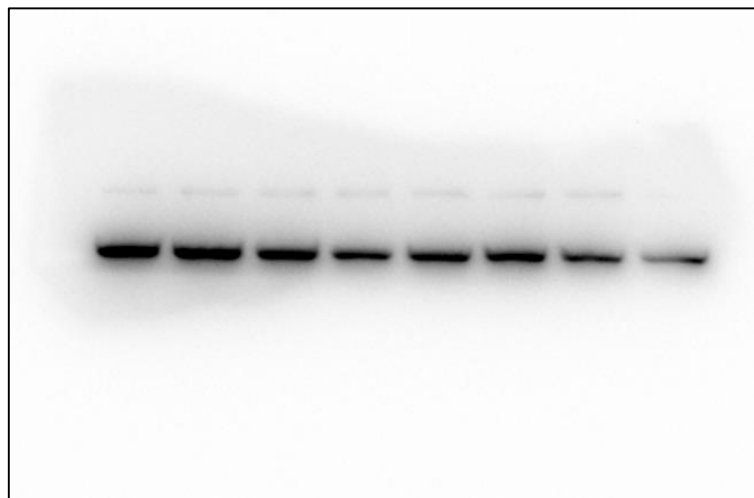

$\beta$ -actin

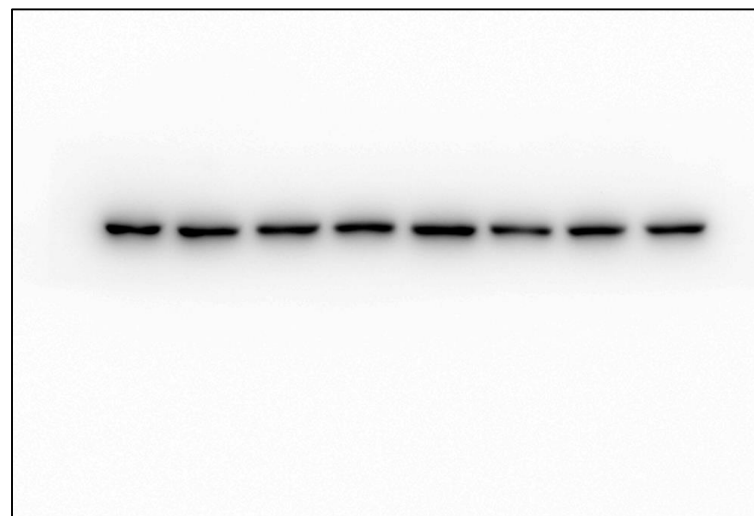

Figure 2F

PDIA4

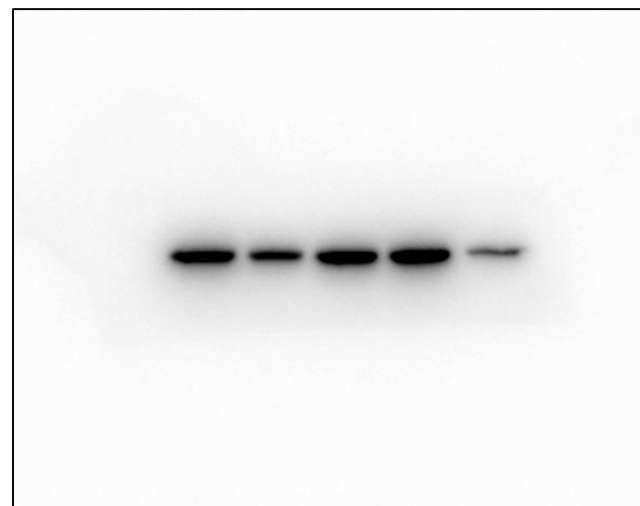

$\beta$ -actin

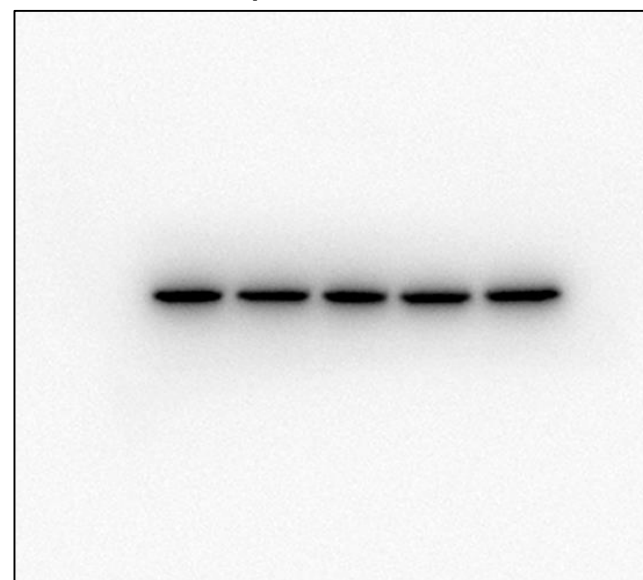

Figure 2H

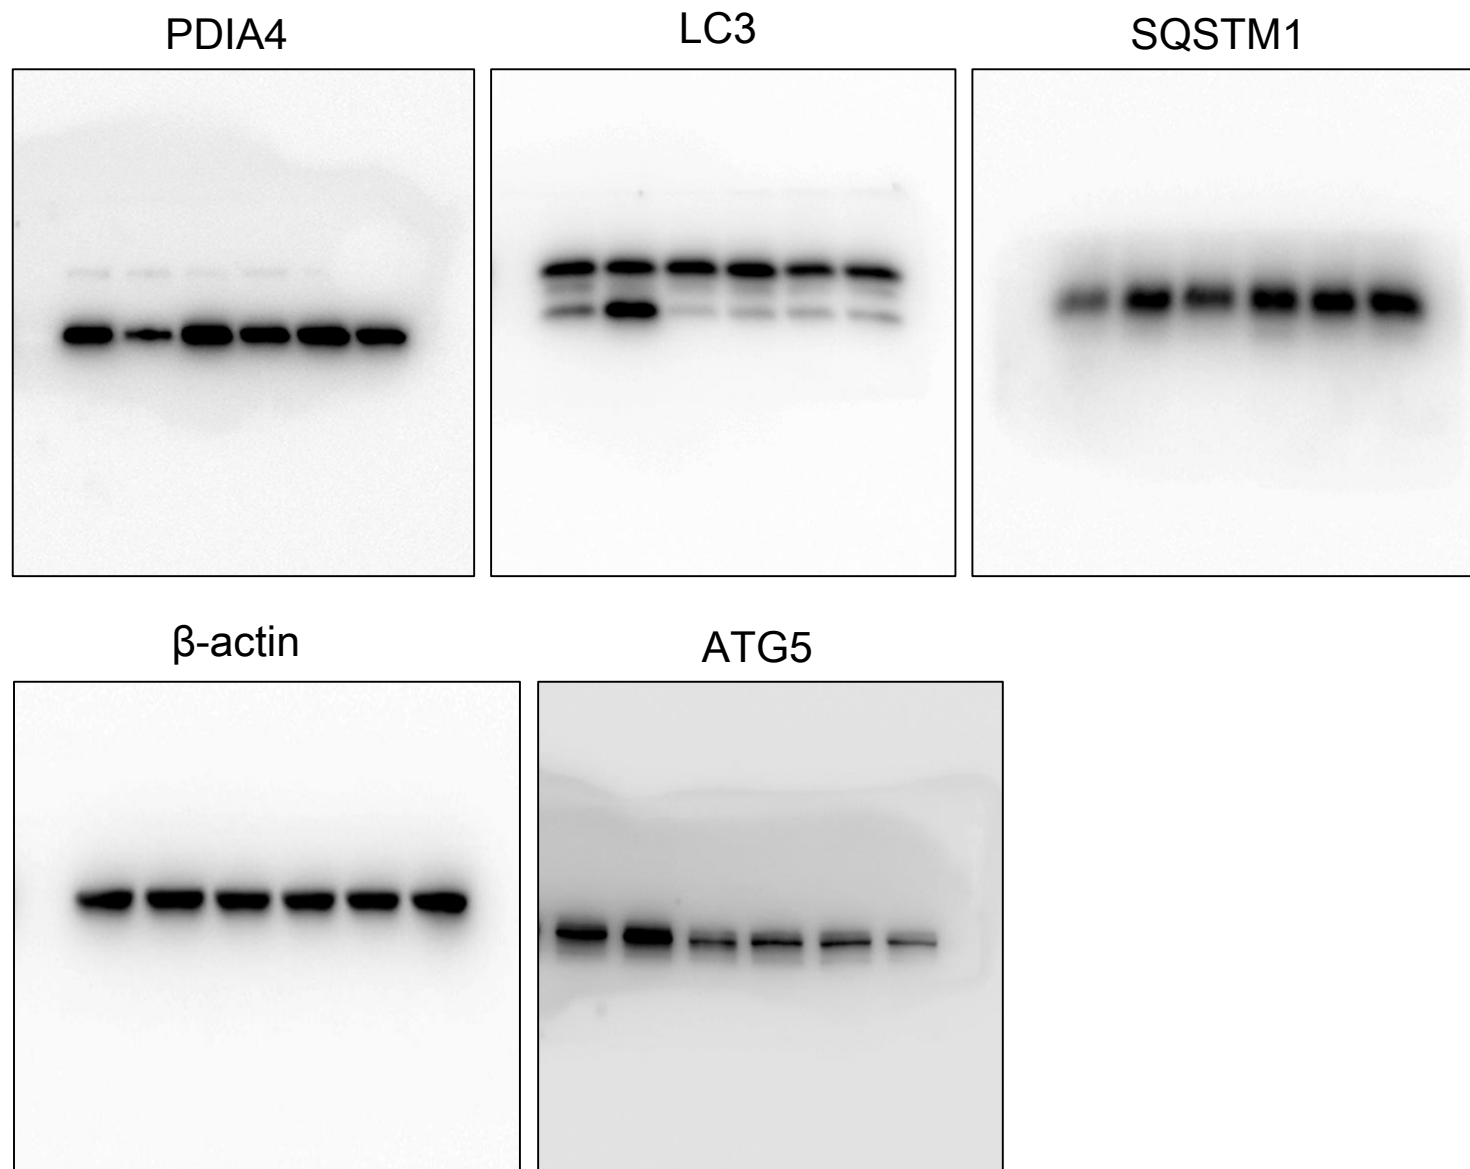

Figure 2I

SQSTM1

PDIA4

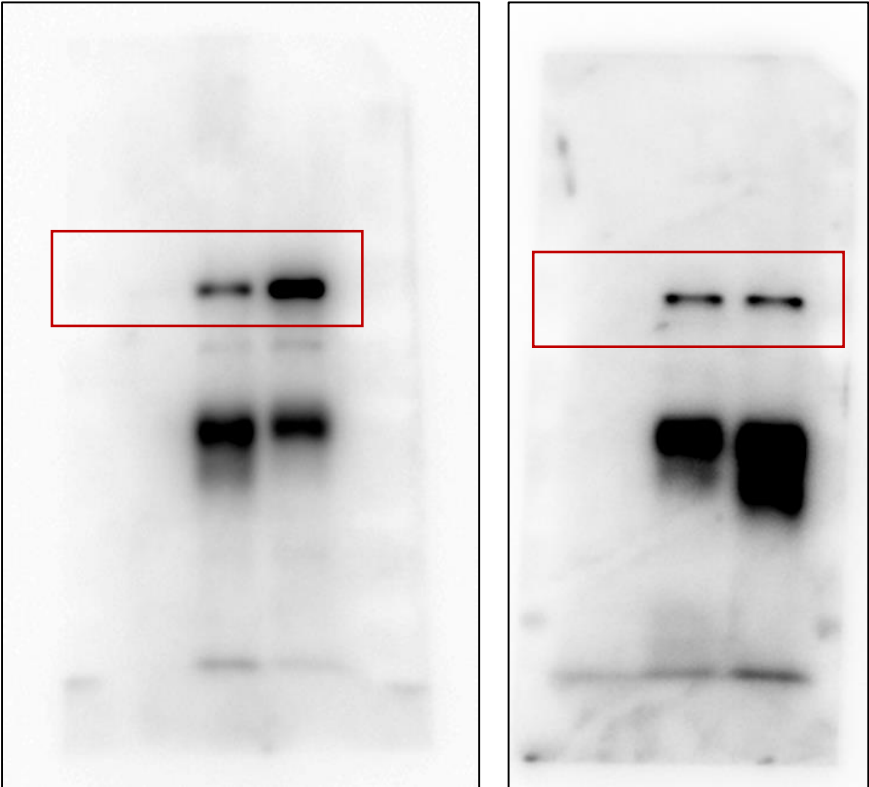

Figure 3A

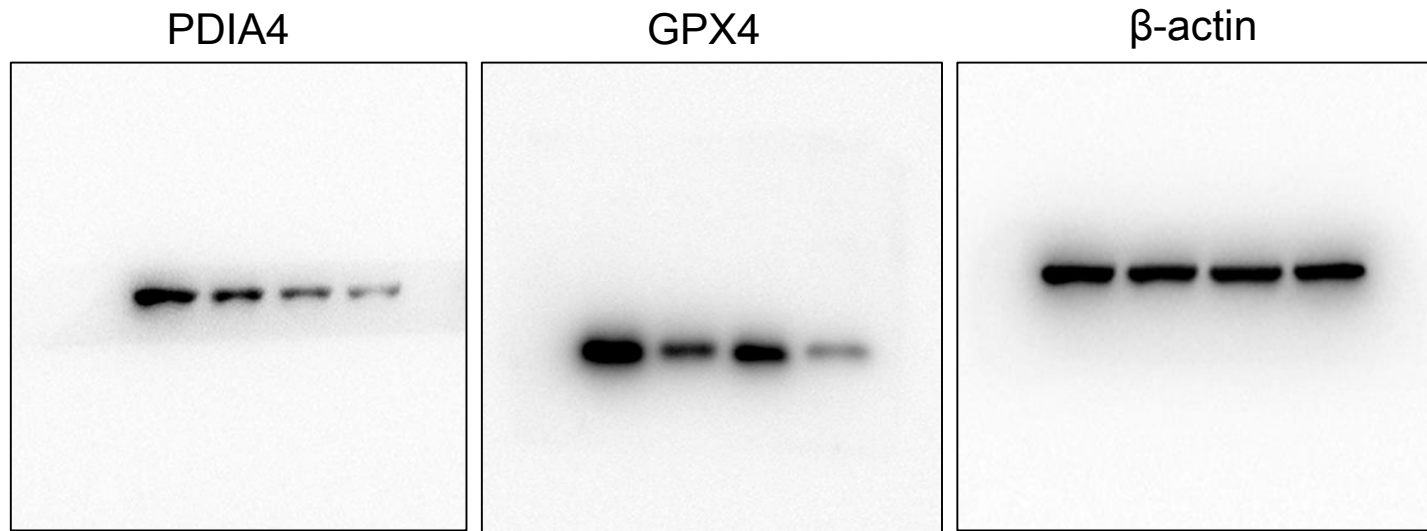

Figure 3G

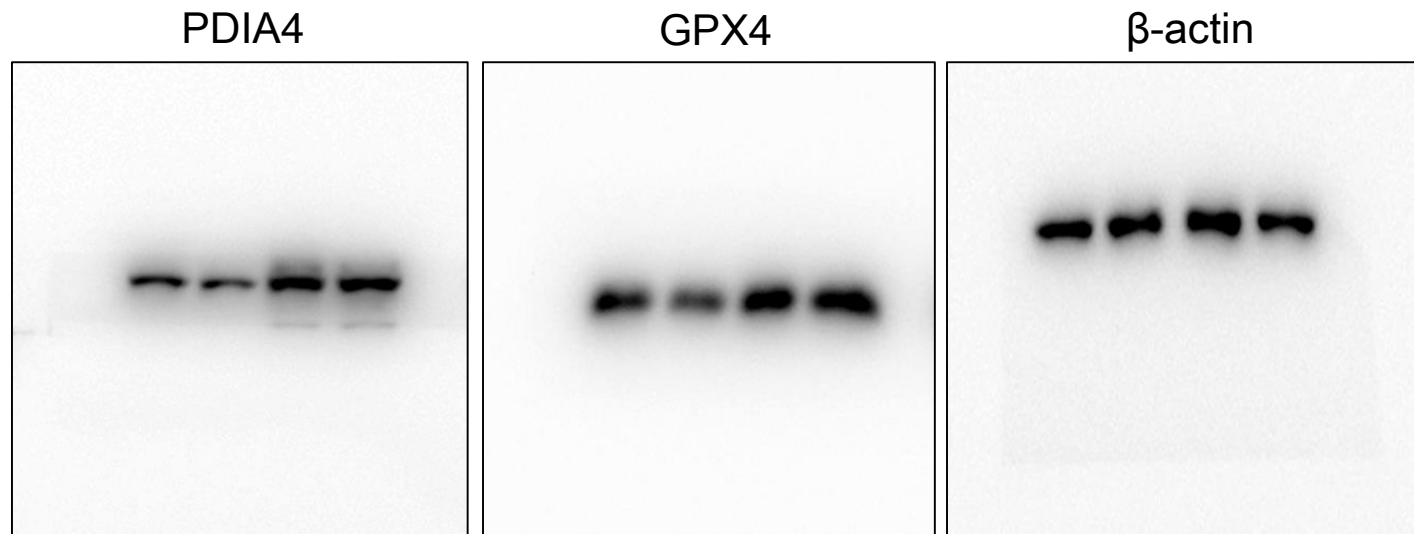



Figure 4C

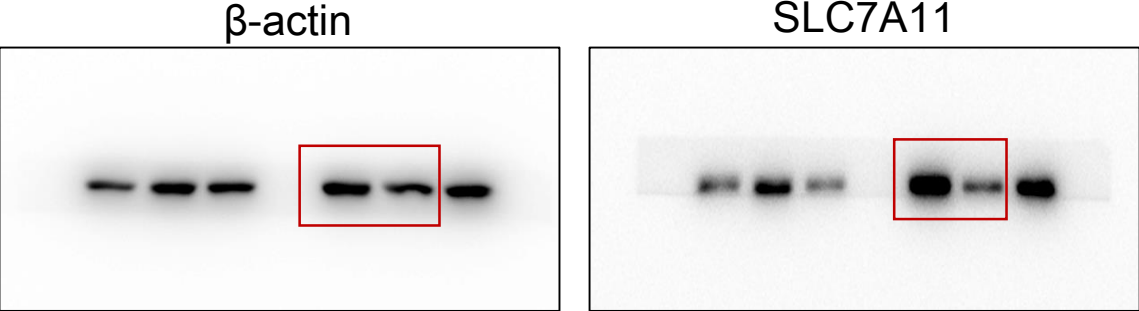

Figure 4D

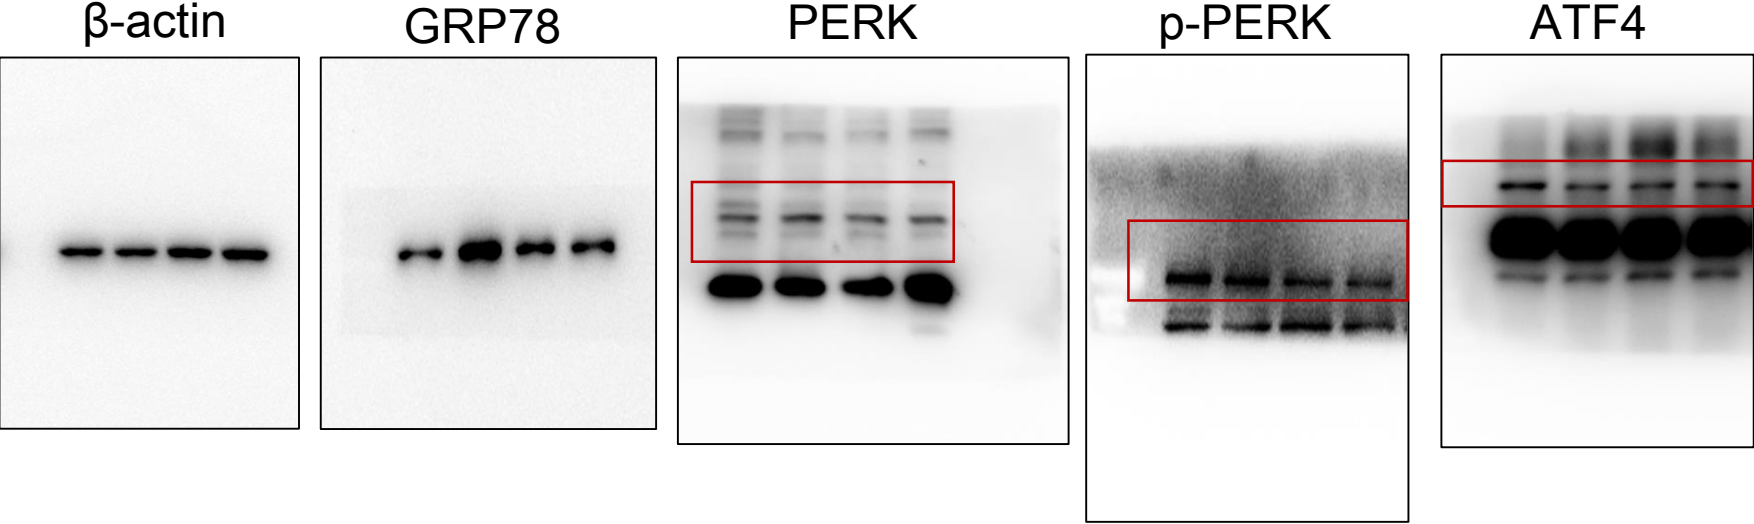

Figure 4E

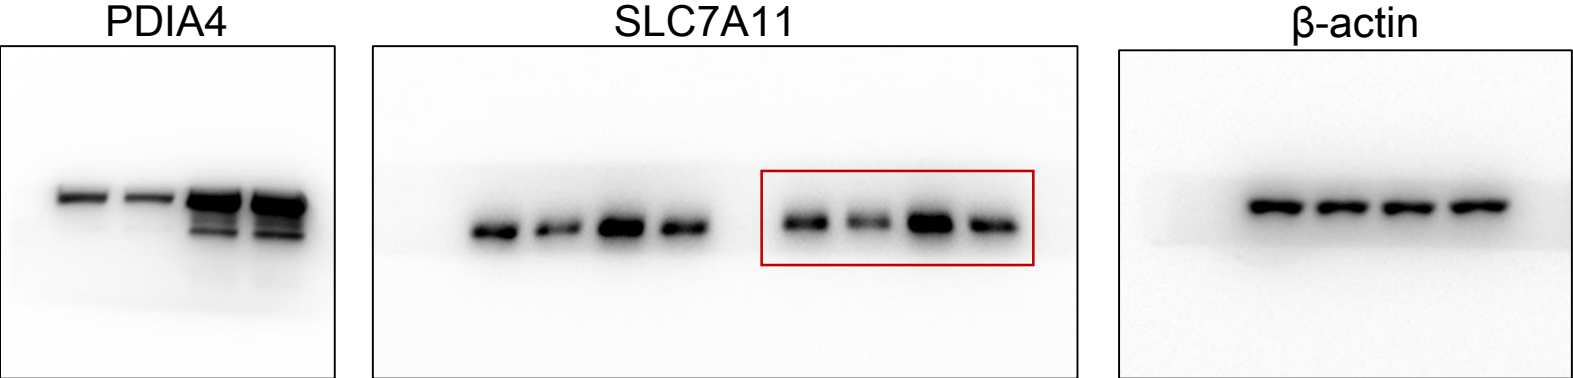

Figure 4F

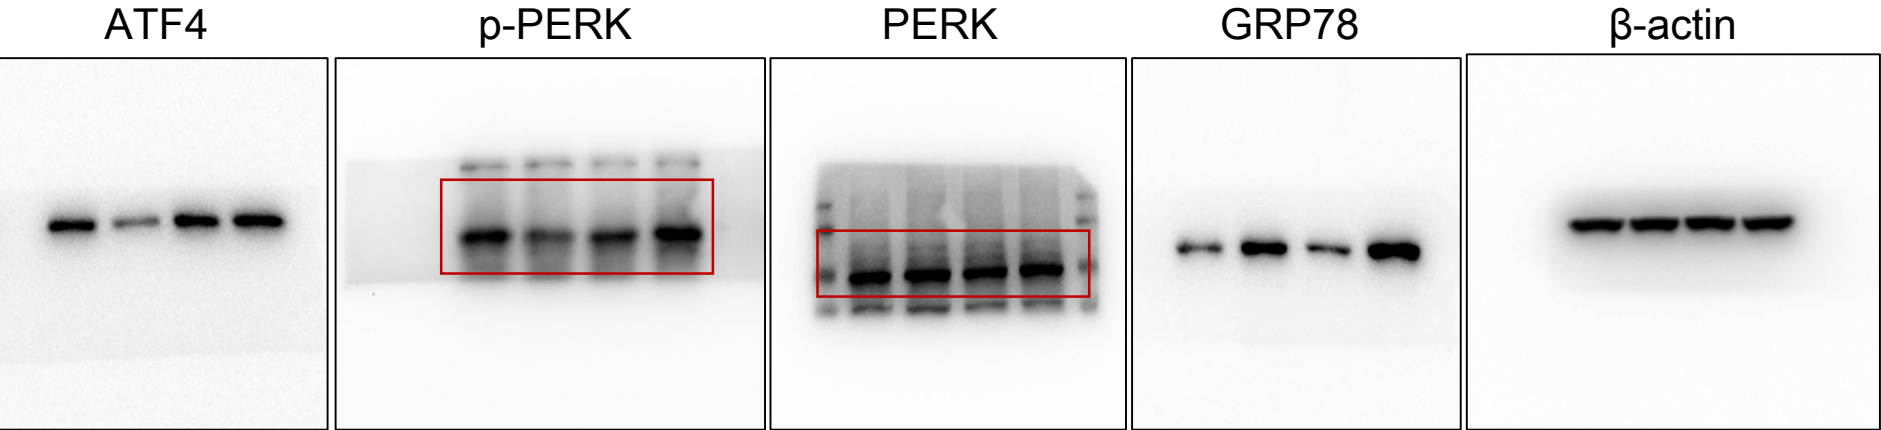

Figure 4I

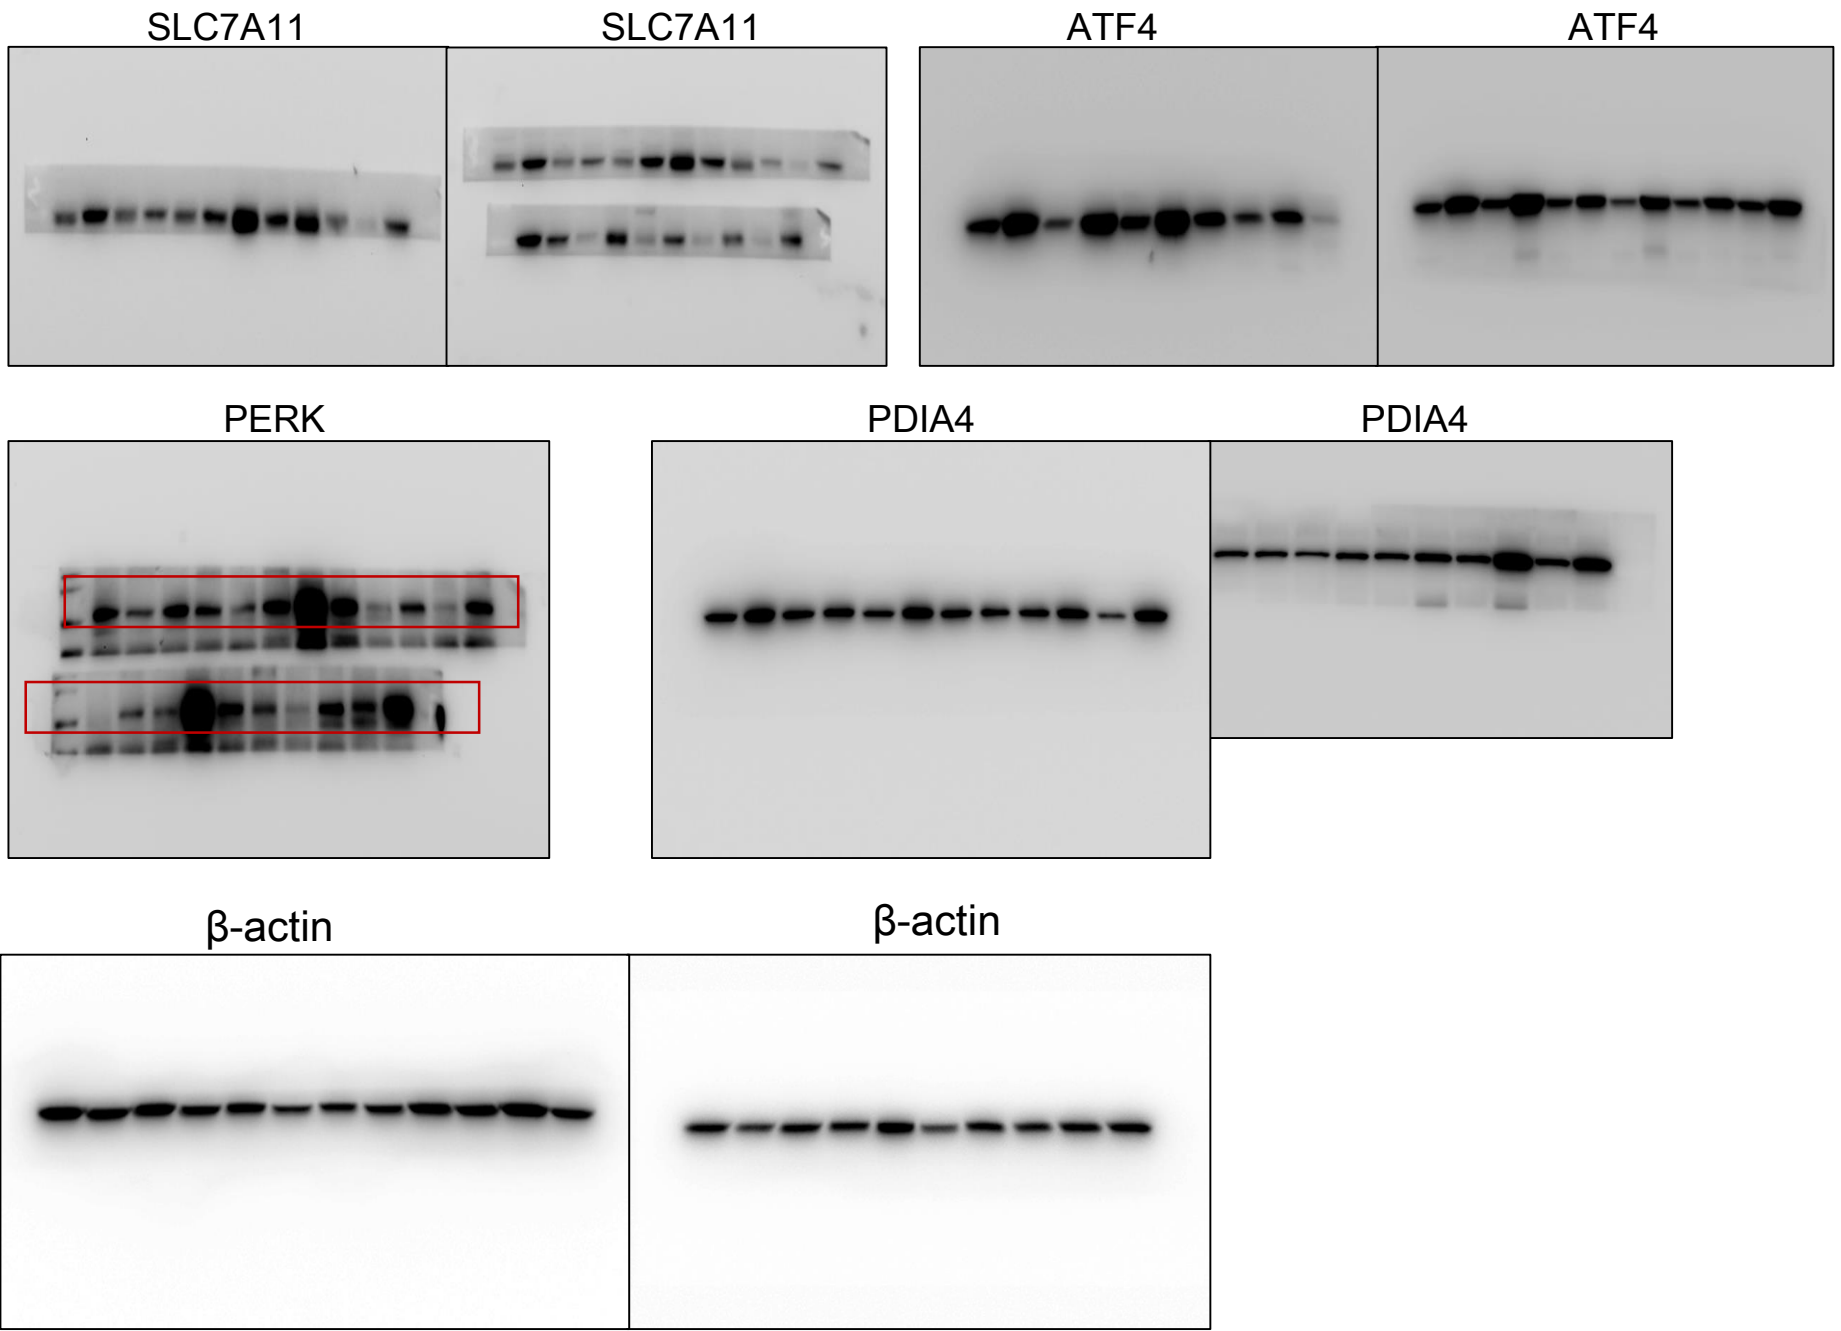

Figure 5H

PDIA4

GPX4

ATF4

SLC7A11

$\beta$ -actin

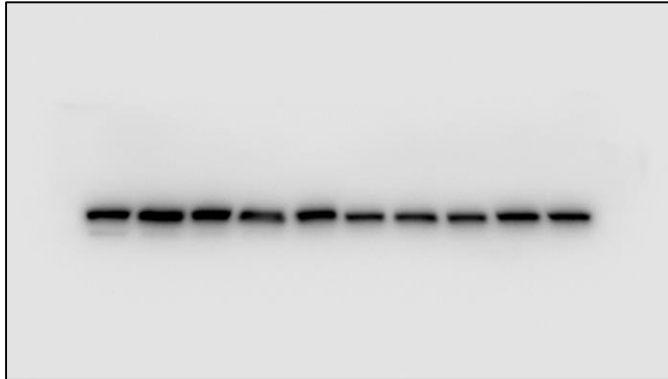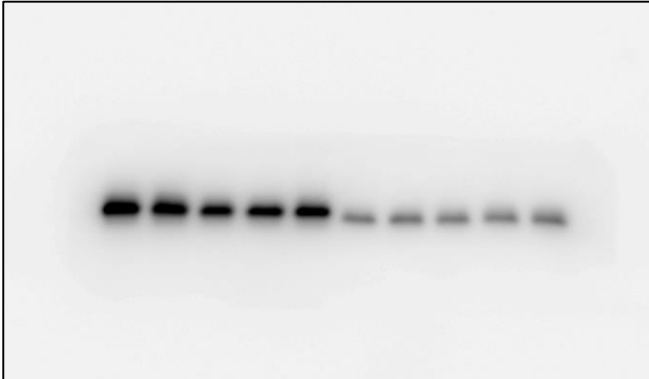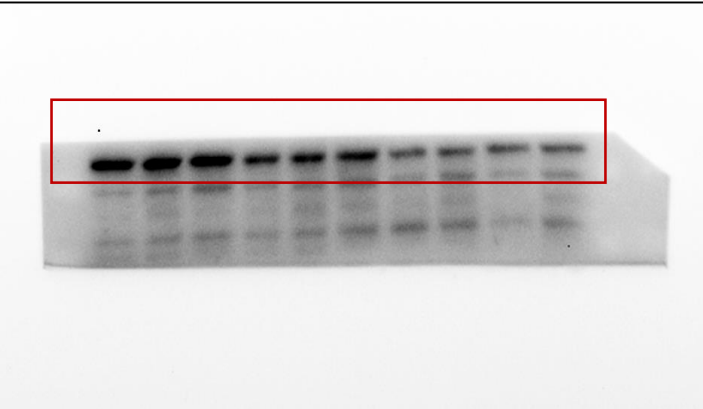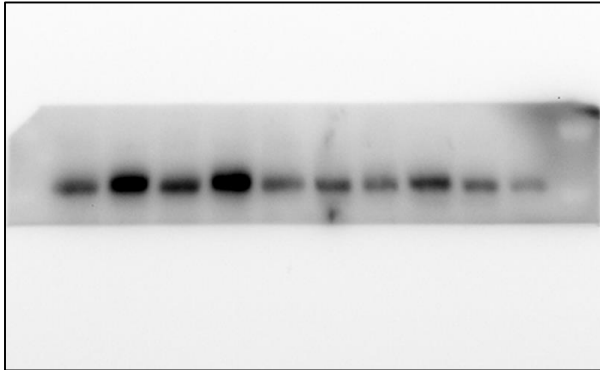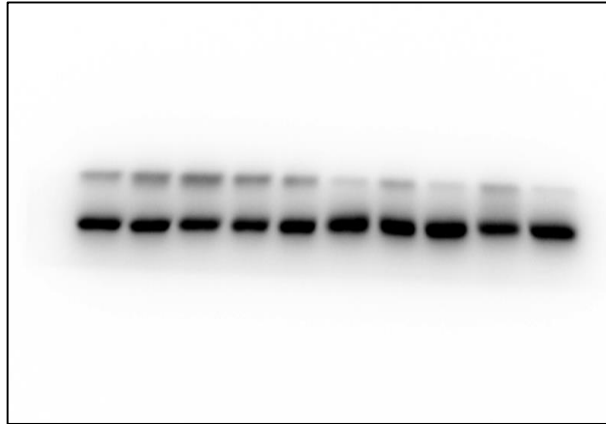

Figure S2

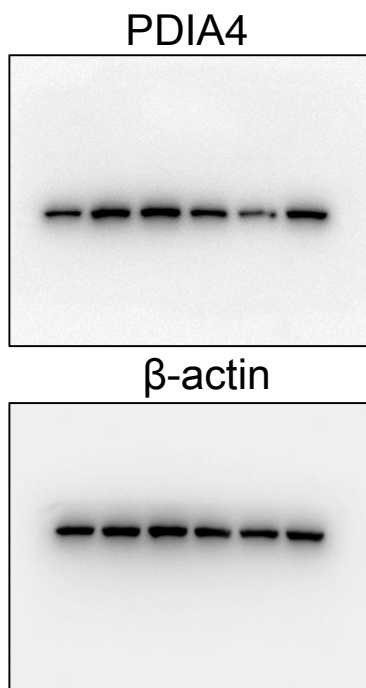

Figure S3A

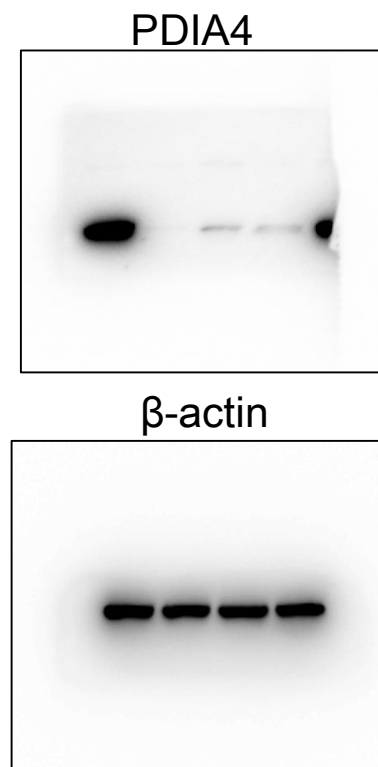

Figure S3C

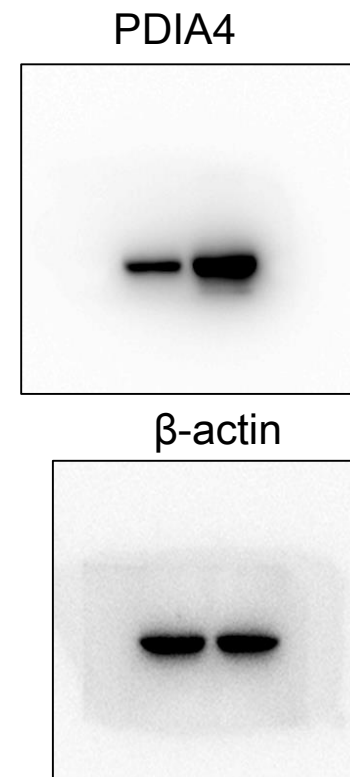

Figure S4A

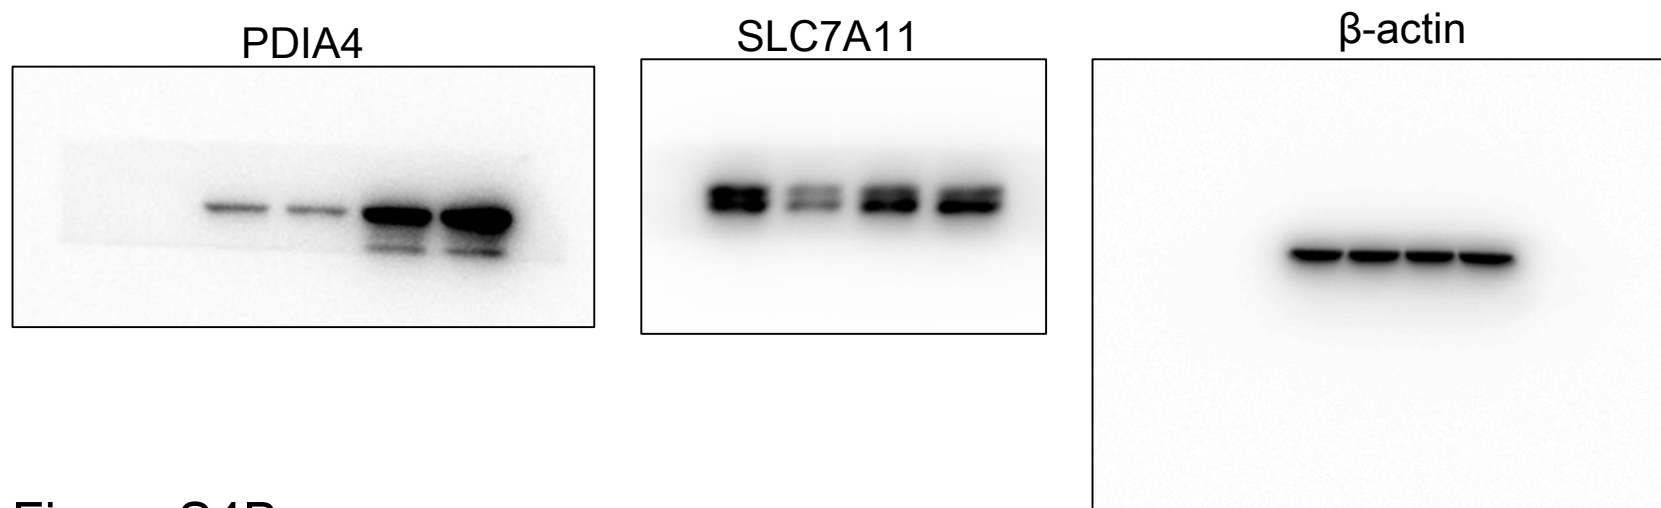

Figure S4B

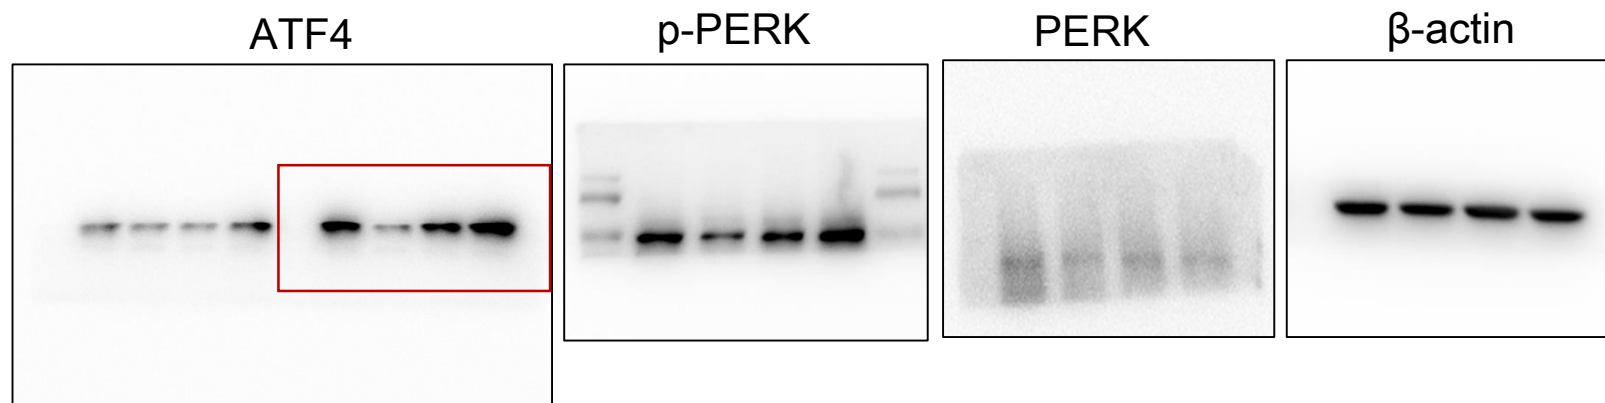

Figure S5A

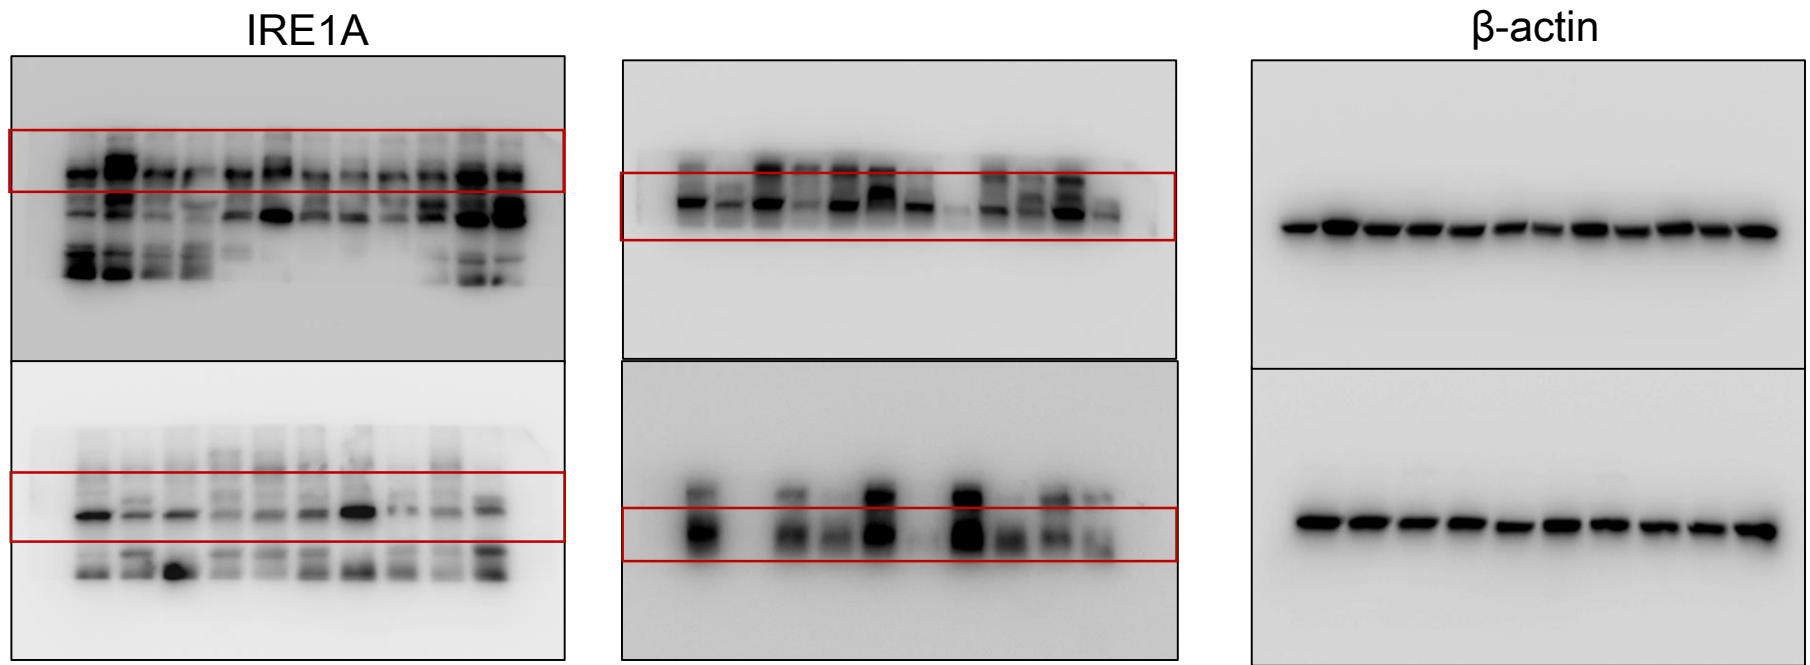

Figure S5B&C

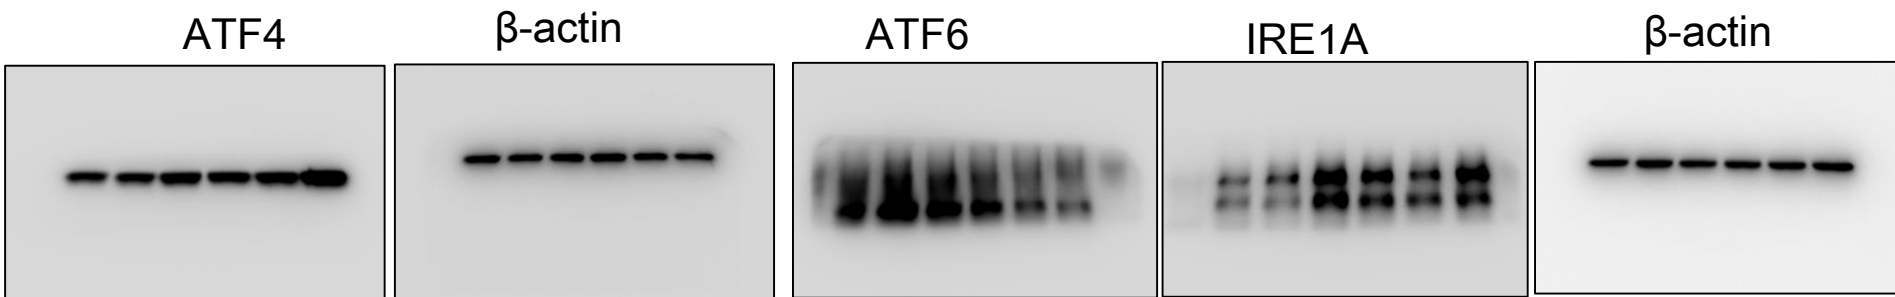

Supplement: 41419_2023_5719_MOESM3_ESM.pdf [file 41419_2023_5719_MOESM3_ESM.pdf]
